# Supplementary material
Source: publisher figshare collection journal article supplement (https://springernature.figshare.com/ndownloader/files/14073635)
Supplement: Supplementary file [file 14073635]

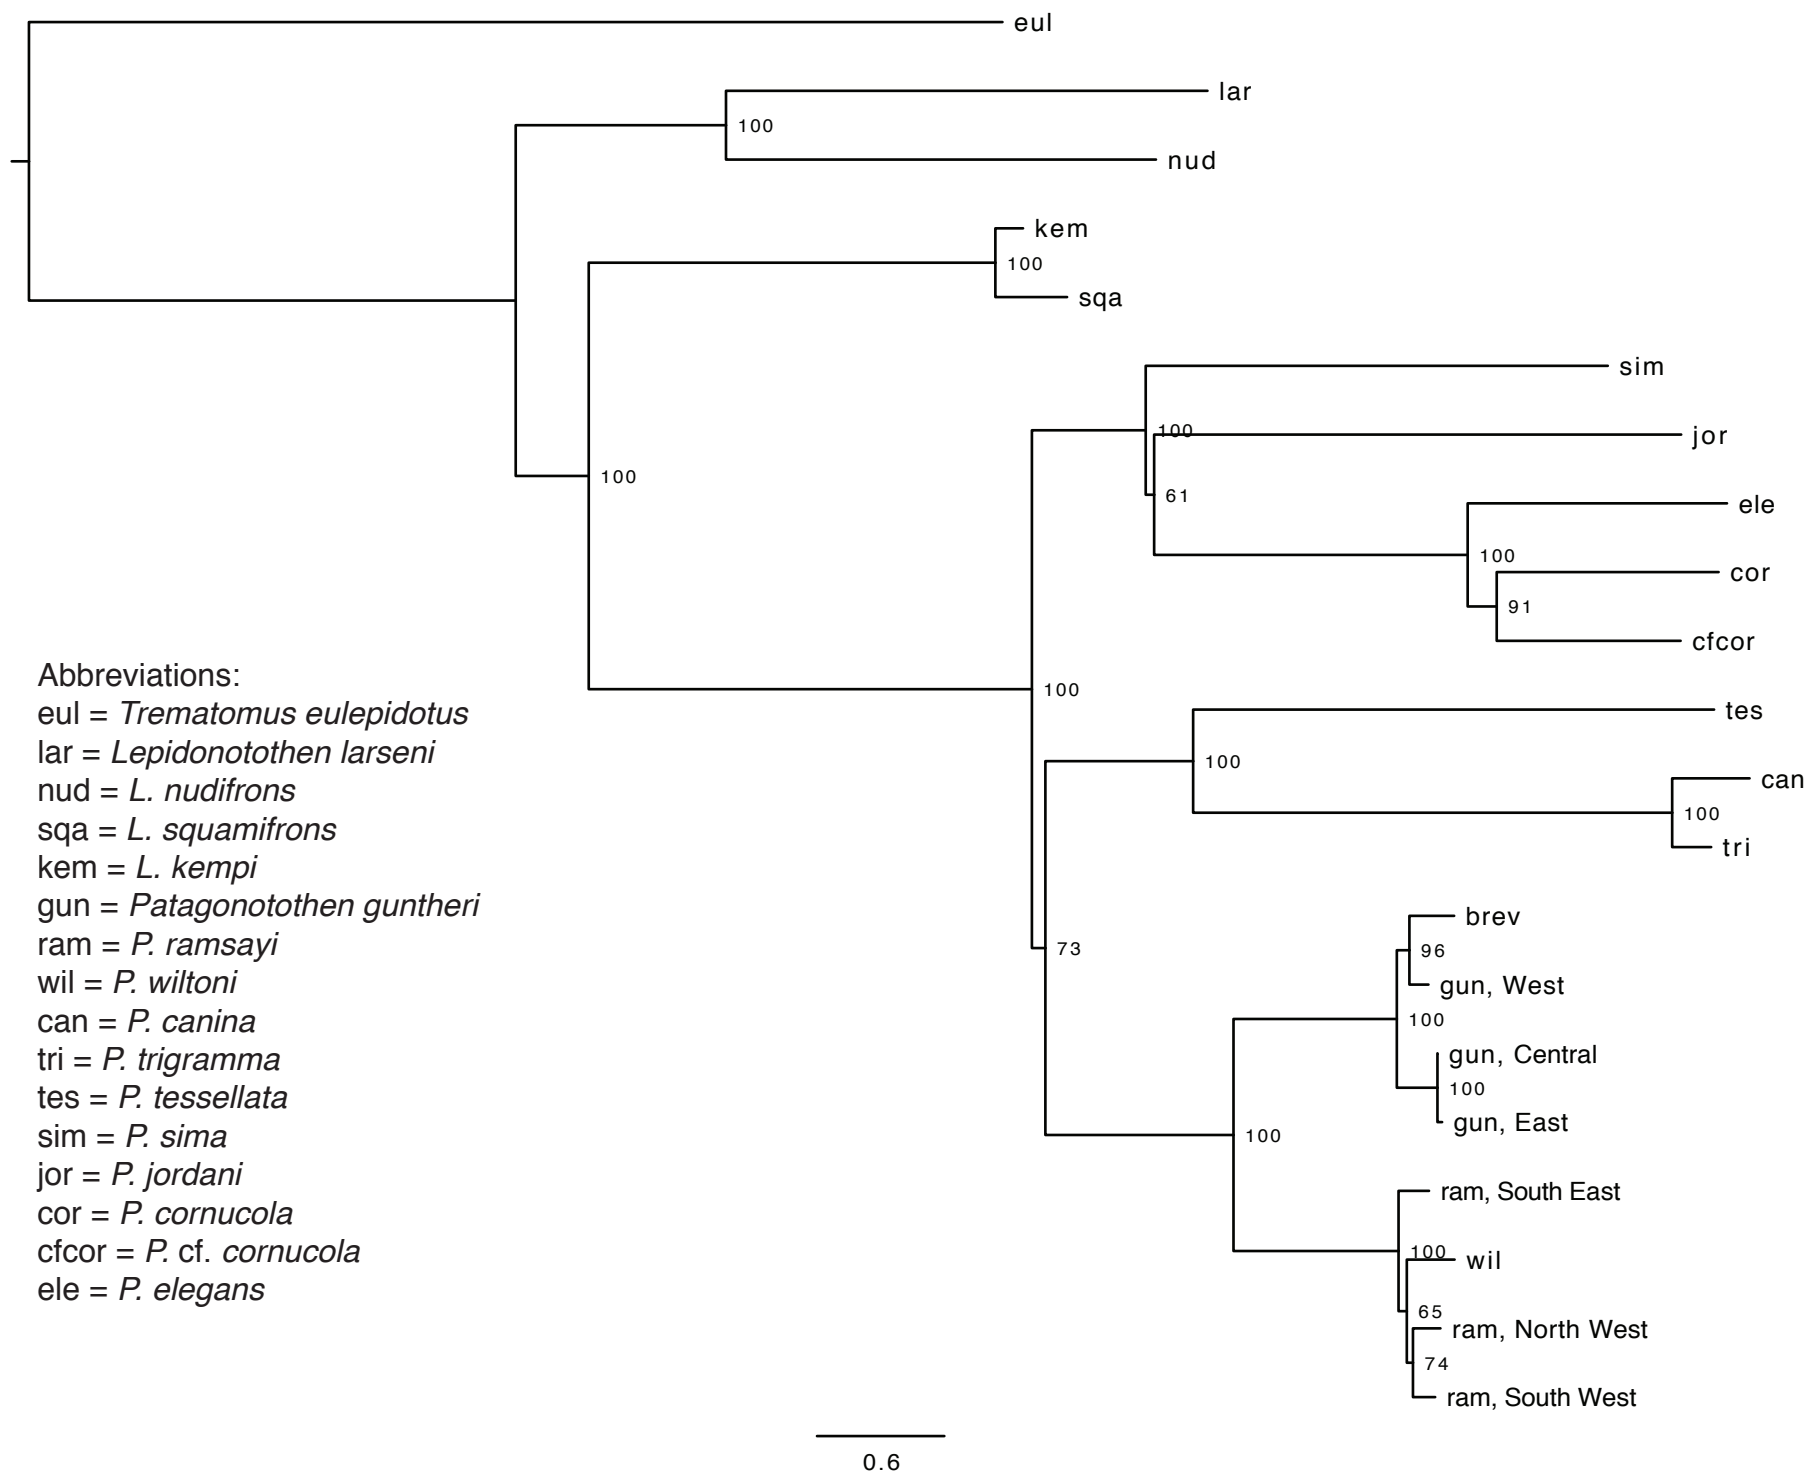

**Additional file 4.** Phylogenetic inference resulting from the application of the Polymorphism-Aware Phylogenetic Model as implemented in the maximum likelihood software IQ-TREE. Individual samples were grouped by species and by geographic origin in the case of *P. ramsayi* and *P. guntheri*. Node labels represent bootstrap support values.
